# Supplementary material for: Hierarchical mesoporous TiO2 microspheres for the enhanced photocatalytic oxidation of sulfonamides and their mechanism
Source: Royal Society of Chemistry journal article supplement (doi:10.1039/c2ra01164f), 2012-01-01
Supplement: c2ra01164f.pdf [file c2ra01164f.pdf]

## Electronic supplementary information

### Hierarchical mesoporous TiO<sub>2</sub> microspheres for enhanced photocatalytic oxidation of sulfonamides and the mechanism study

Changsheng Guo<sup>ab</sup>, Jian Xu<sup>ab\*</sup>, Yuan Zhang<sup>ab</sup>, Yan He<sup>ab</sup>

a: State Key Laboratory of Environmental Criteria and Risk Assessment, Chinese Research Academy of Environmental Sciences, Beijing 100012, China

b: Laboratory of Riverine Ecological Conservation and Technology, Chinese Research Academy of Environmental Sciences, Beijing 100012, China

\*: Corresponding author. Email: [xujian@craes.org.cn](mailto:xujian@craes.org.cn). Tel: 86-10-84915237. Fax: 86-10-84926073

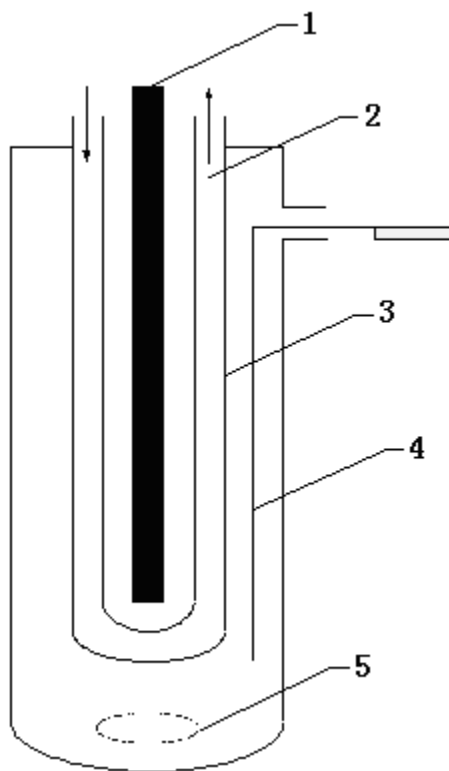

Figure S1. The experimental apparatus. (1) Xenon lamp; (2) cooling water; (3) immersion well; (4) sulfonamides solutions; (5) magnet.

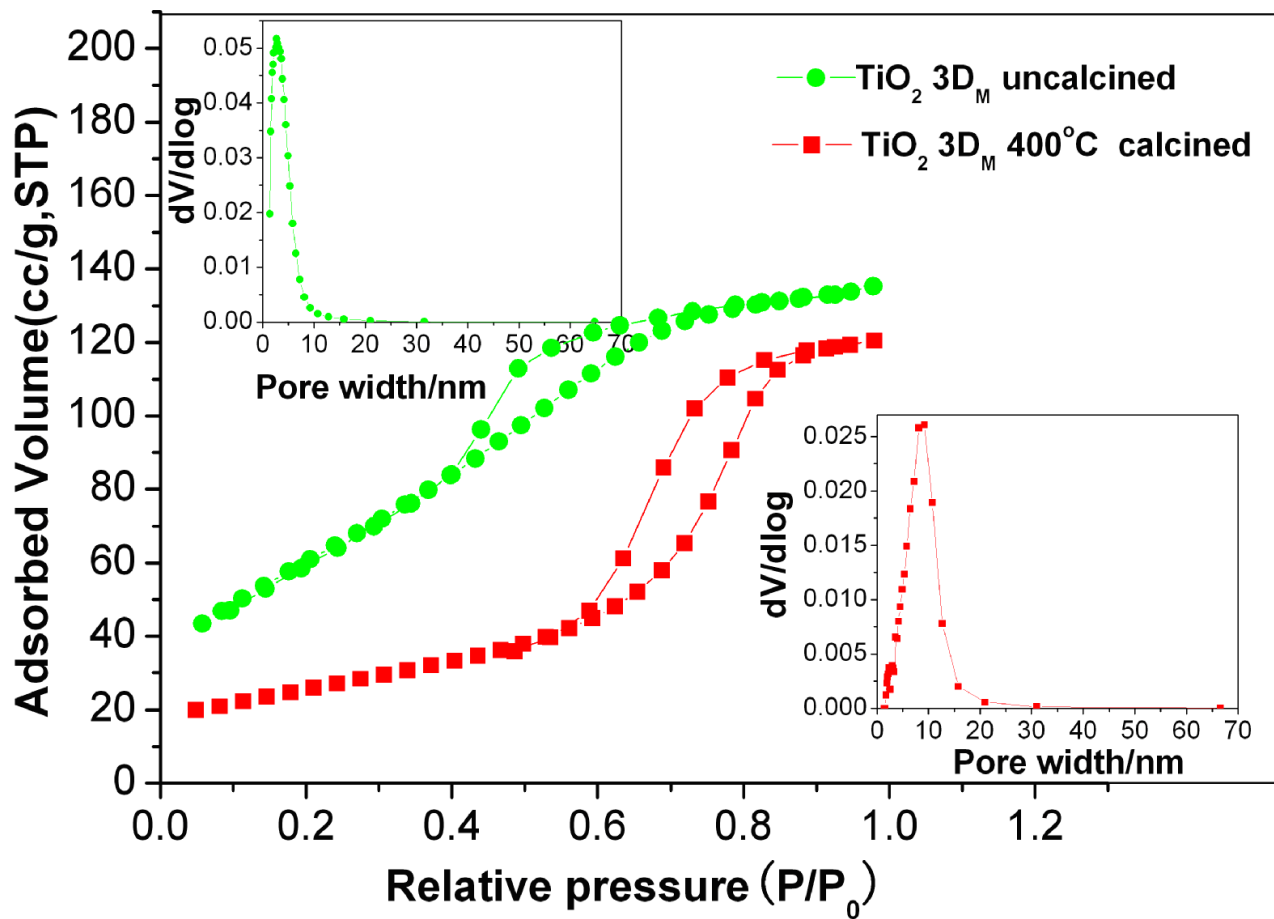

Figure S2 Nitrogen gas adsorption-desorption isotherms and corresponding pore size distribution curve calculated from adsorption branch of the nitrogen isotherm (inside) of mesoporous  $\text{TiO}_2$  microspheres

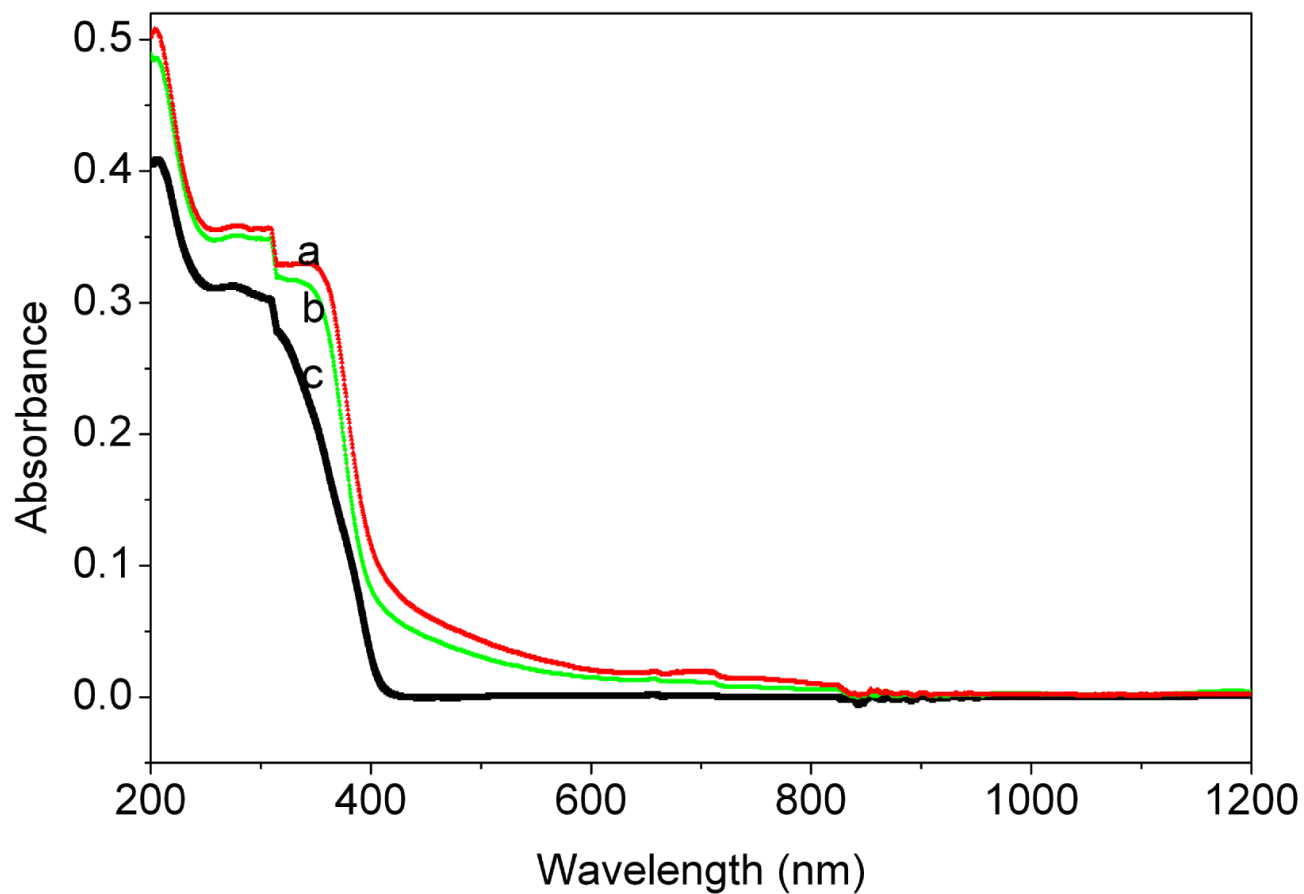

Figure S3. UV-vis reflection spectra of the catalysts (a TiO<sub>2</sub> 3DM calcined at 400 °C, b TiO<sub>2</sub> 3DM uncalcined, c P25 TiO<sub>2</sub>)

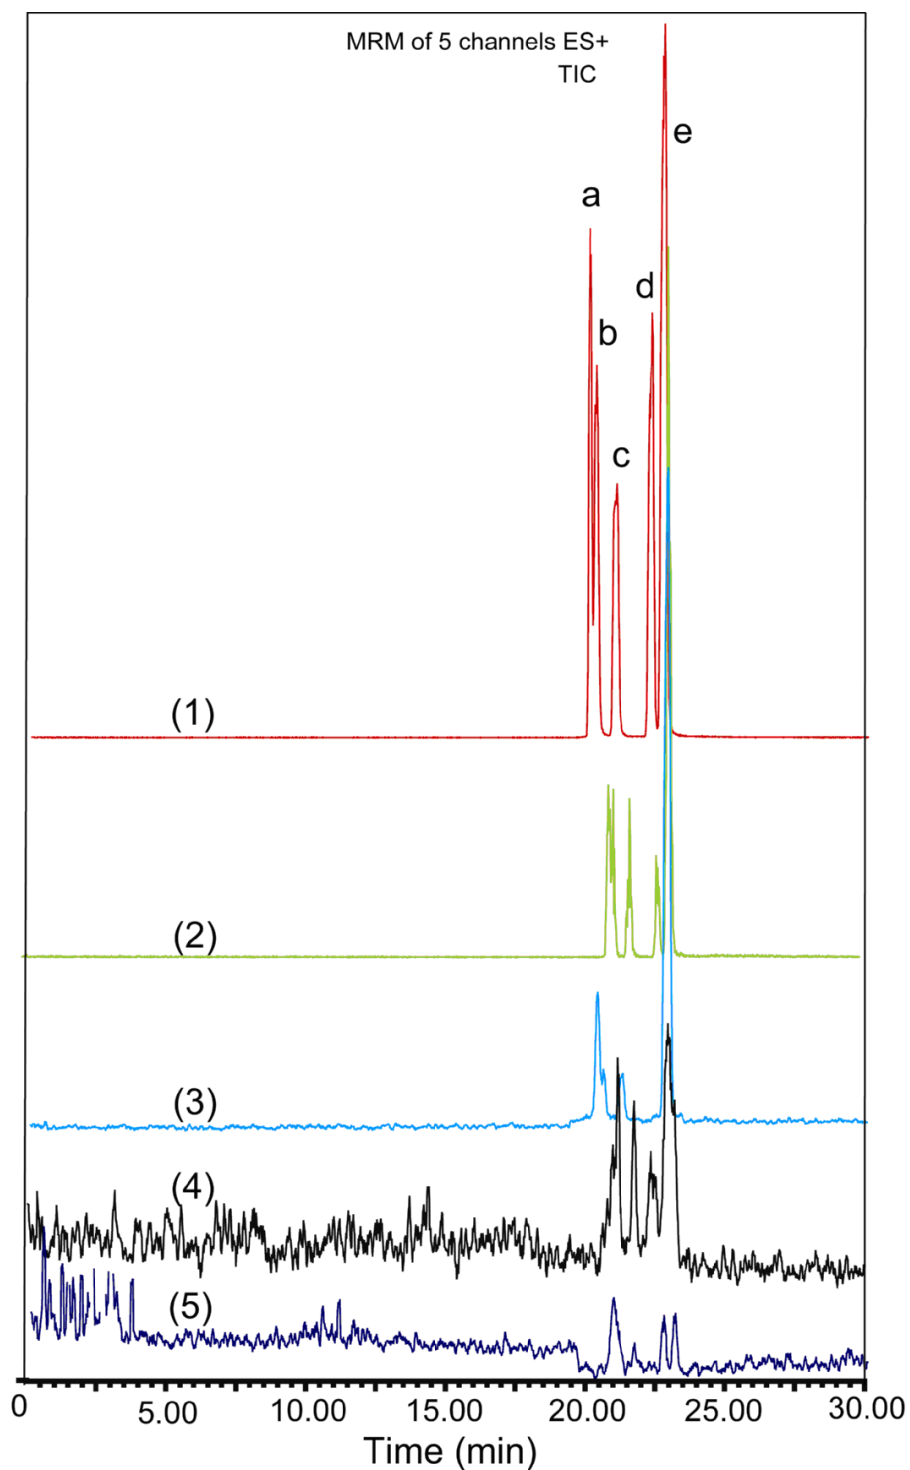

Figure S4. Mass chromatograms of five sulfonamides solutions after different simulated solar light irradiation time with  $\text{TiO}_2$  3D<sub>M</sub>: (1) 0min, (2) 10min, (3) 20min, (4) 40min, (5) 60min. (a SAAM; b SPD; c SMZ; d SIA; e SDM)

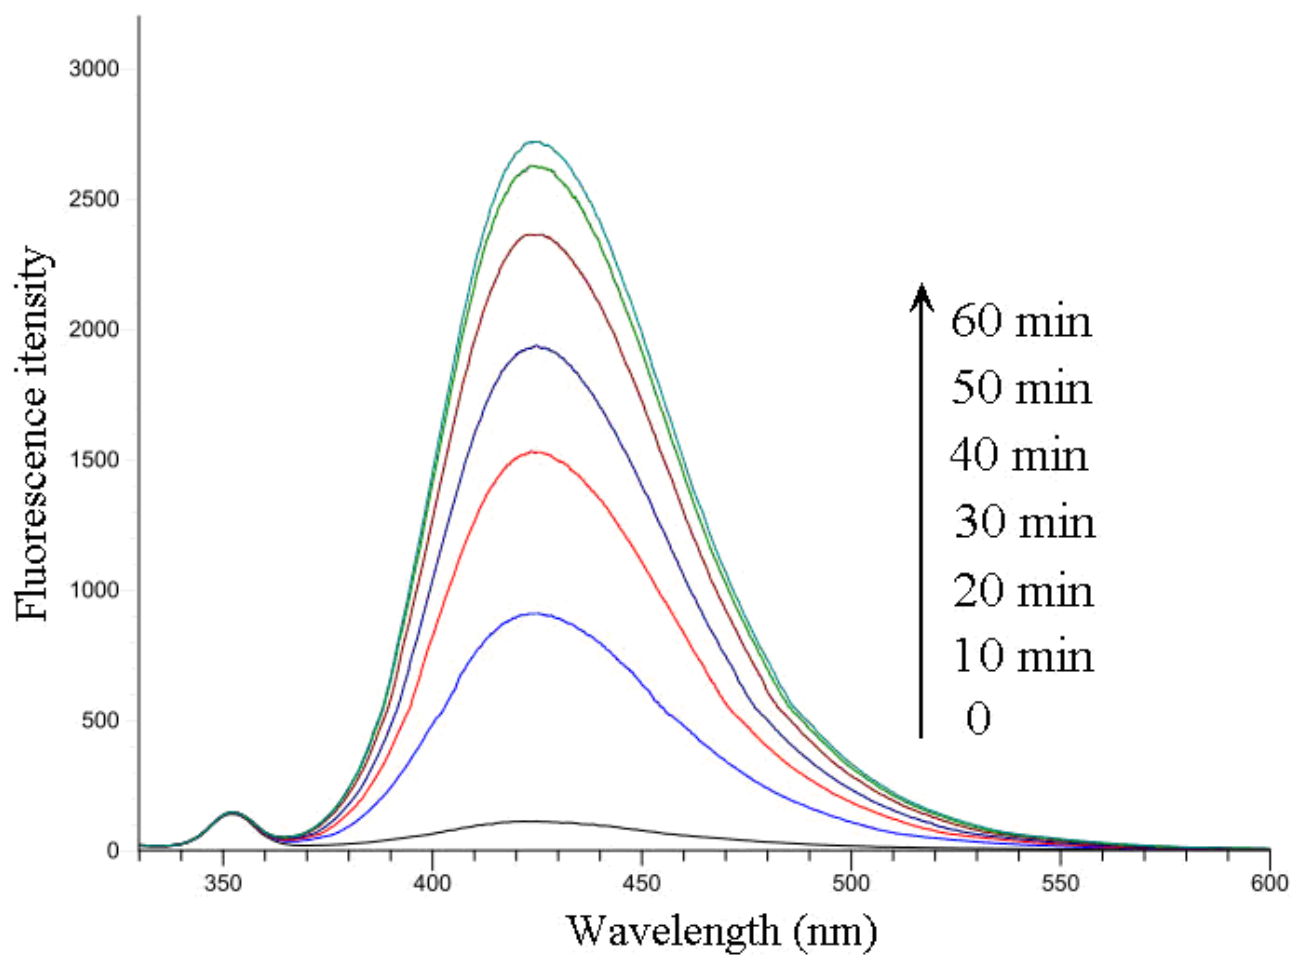

Figure S5. Temporal fluorescence spectral changes of  $5 \times 10^{-4}$  M terephthalic acid solution in  $2 \times 10^{-3}$  M NaOH with the presence of mesoporous  $\text{TiO}_2$  microspheres under simulated solar light irradiation.

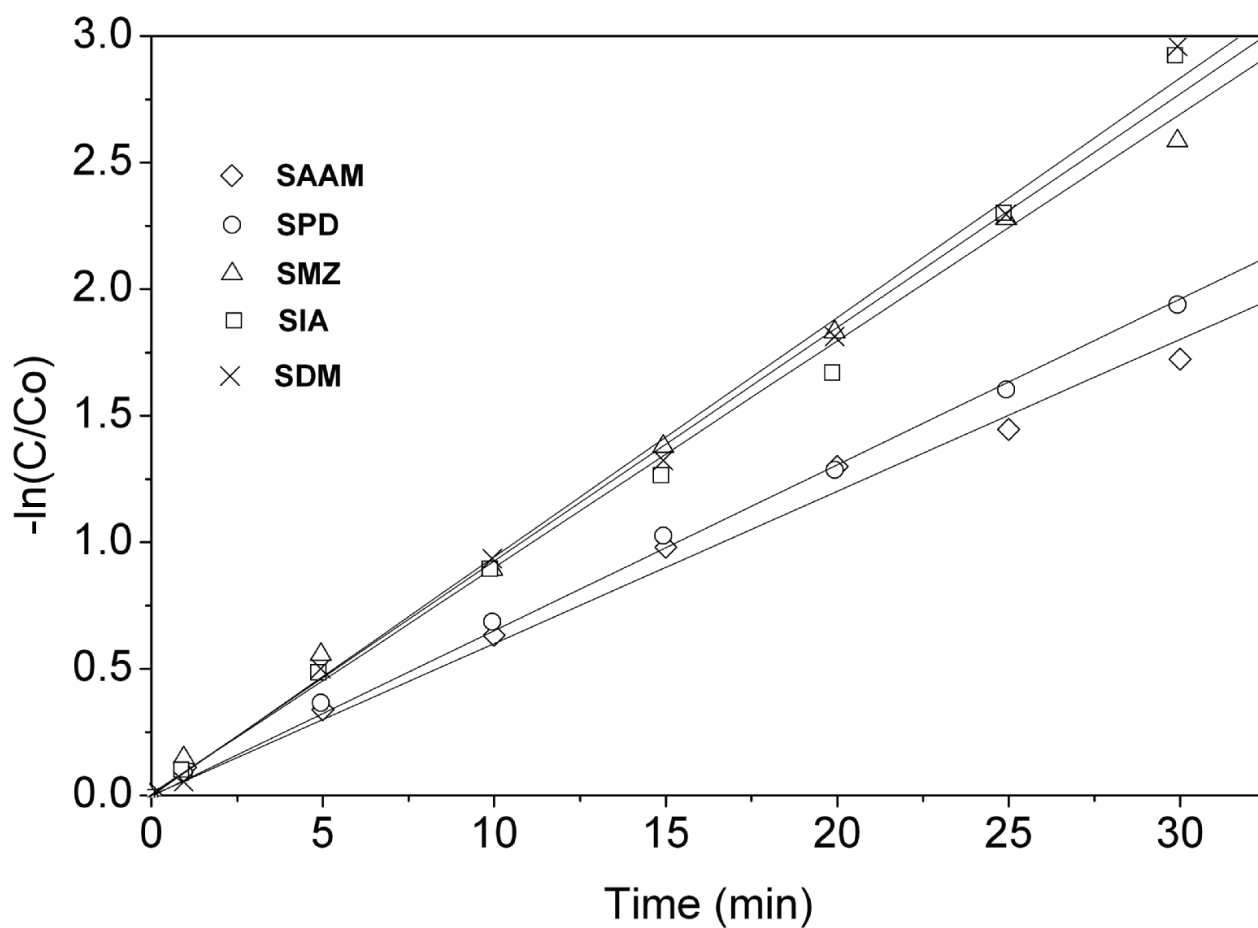

Figure S6. Kinetic linear simulation curve of five sulphonamides (0.1 mM) photocatalytic degradation by mesoporous  $\text{TiO}_2$  microspheres ( $0.5 \text{ g L}^{-1}$ ) under simulated solar light irradiation with the assistance of  $\text{H}_2\text{O}_2$  (5.88 mM)

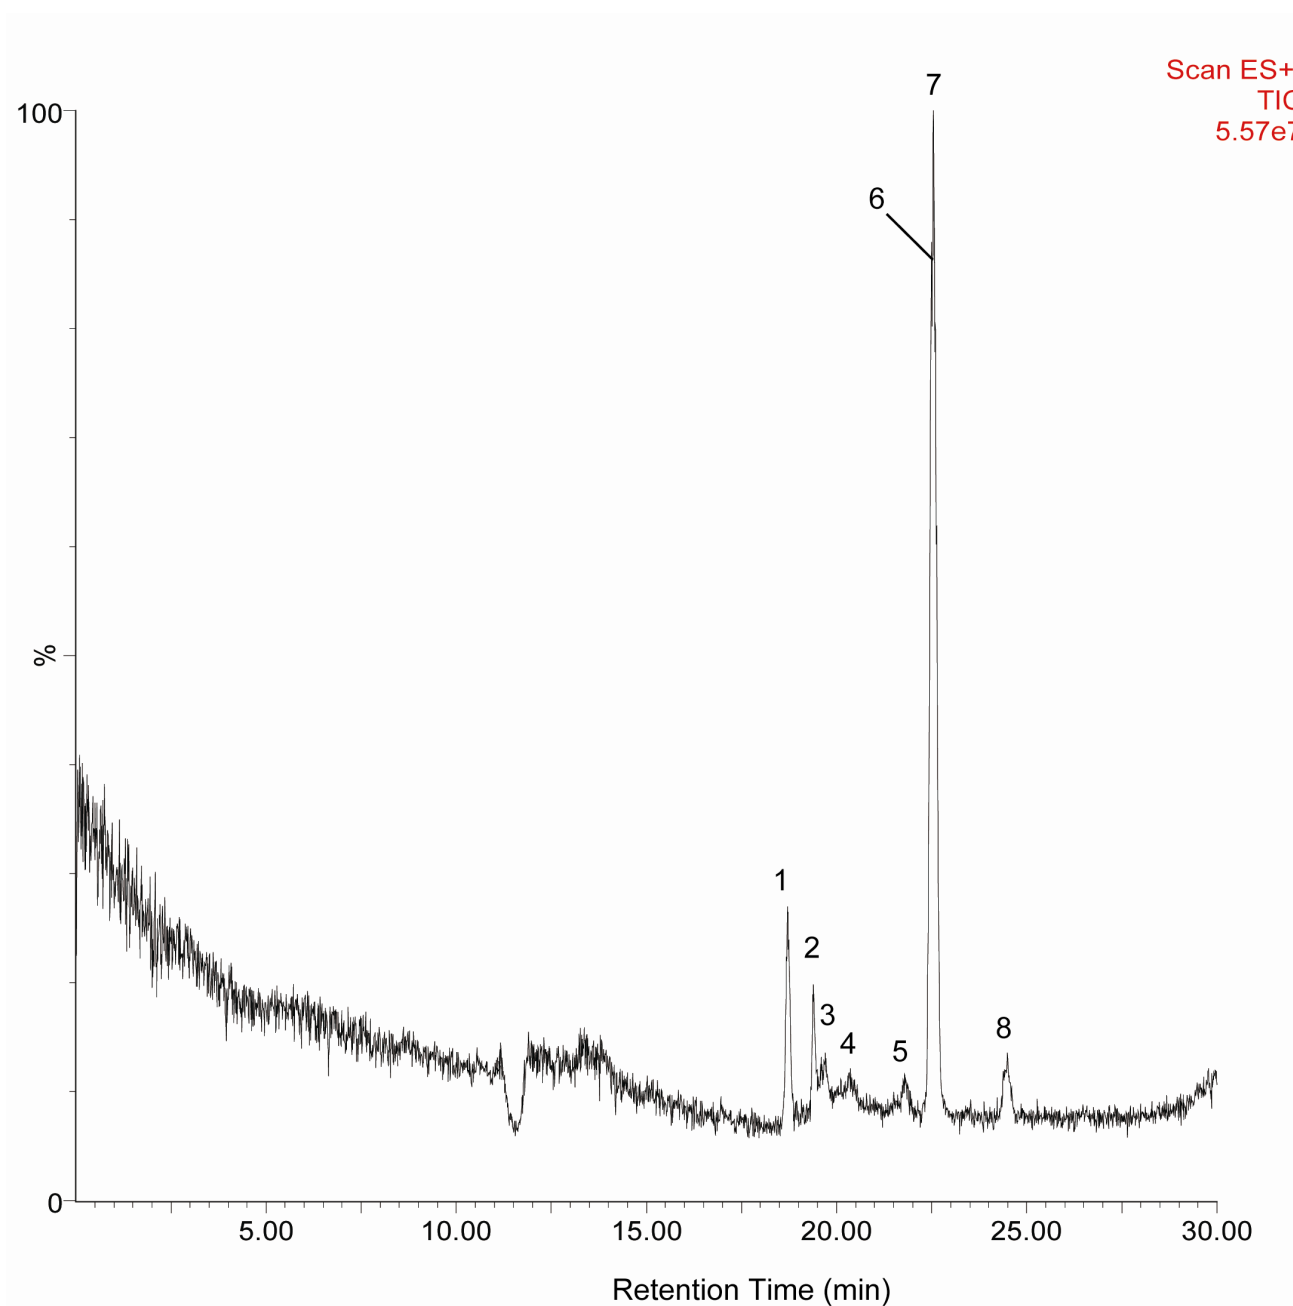

Figure S7. Liquid chromatography mass spectrometry (LC-MS) chromatogram for SDM photocatalysis after 10 min irradiation



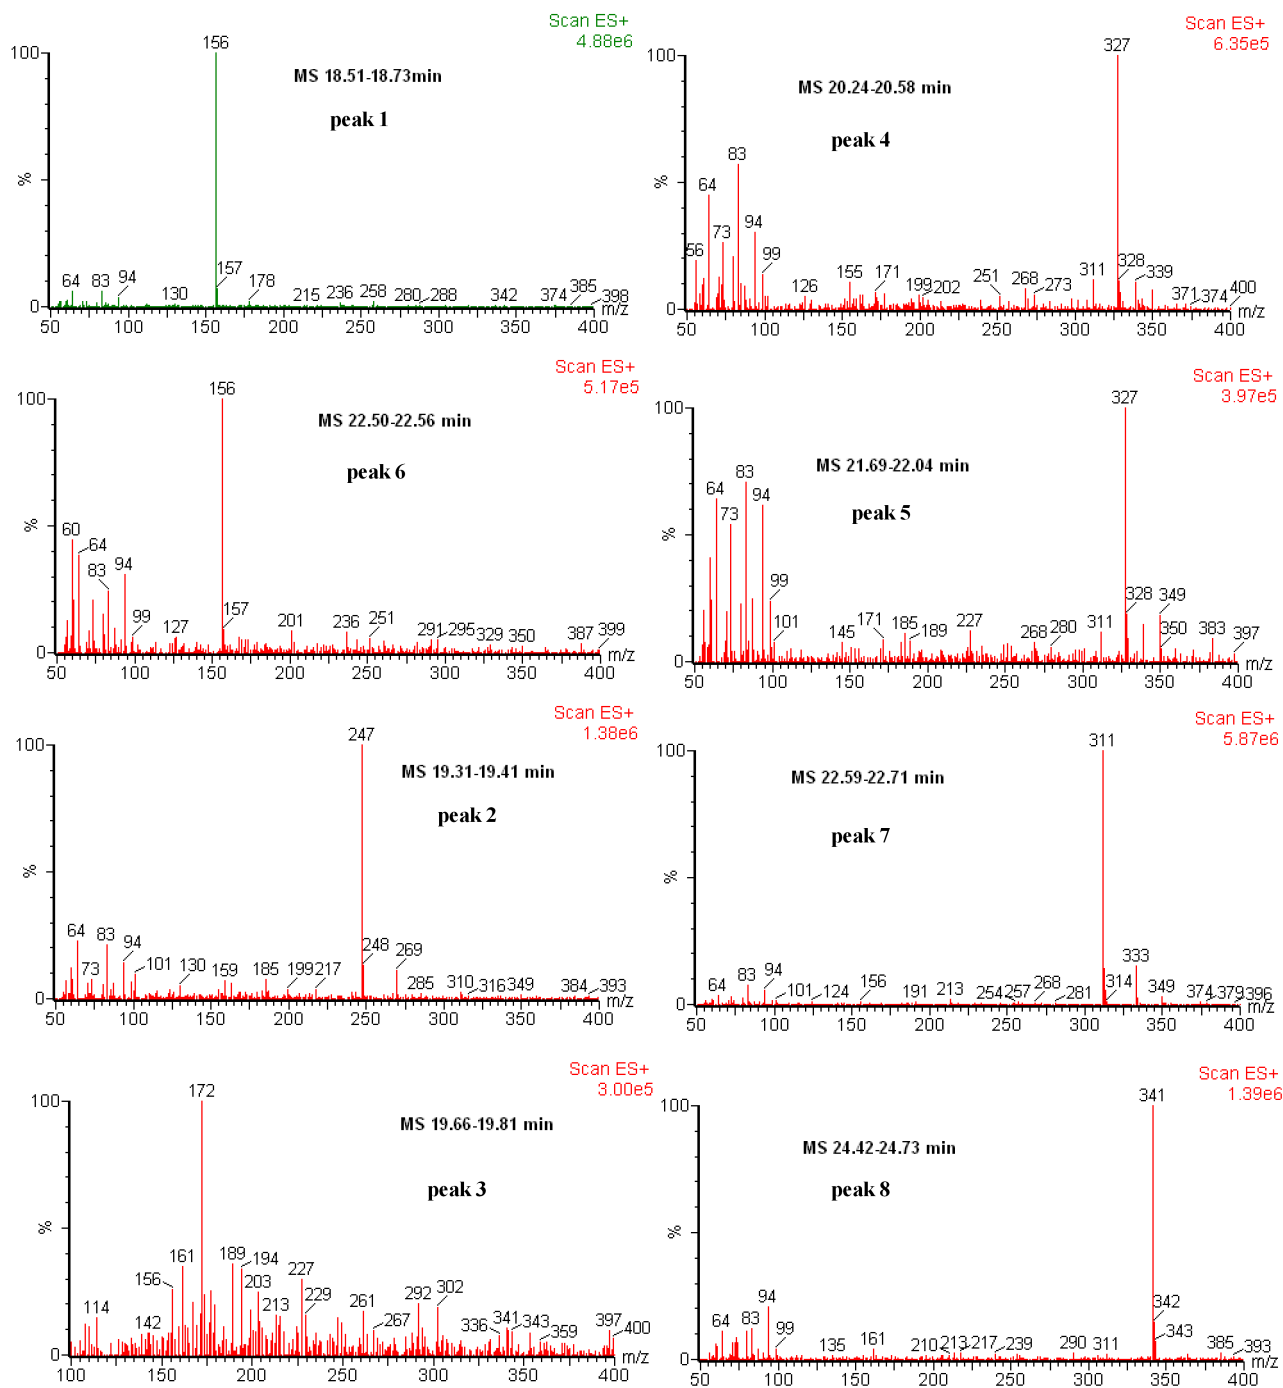

Figure S8. Mass spectra corresponding proposed structures of six main peaks and SDM in TIC.

Table S1. Analyte acronyms, molecular weights, ions monitored for LC–MS/MS, and conditions of cone voltages and collision energies.

| Analyte | Molecular weight | Precursor ion (m/z) | Product ion (m/z) | Cone voltage (v) | Collision energy (v) |
|---------|------------------|---------------------|-------------------|------------------|----------------------|
| SAAM    | 214.2            | 215                 | 156               | 20               | 10                   |
| SPD     | 249.3            | 250                 | 156               | 30               | 20                   |
| SMZ     | 278.3            | 279                 | 156               | 28               | 20                   |
| SIA     | 367.3            | 368                 | 186               | 20               | 12                   |
| SDM     | 310.3            | 311                 | 156               | 30               | 22                   |
